# Supplementary material
Source: publisher site journal article supplement (https://www.dovepress.com/article/603131)
Supplement: Supplementary file 1 [file 603131%20Supplementary%20Table%201_1.docx]

Supplementary Table 1 Comparison of gut microbiota functional gene abundance between SJL< 2h/d and SJL≧2h/d groups

| Gene (KO ID) |  | SJL< 2h/d (N=30) | | |  | SJL≧2h/d (N=90) | | |  | Z value | *P* value | *Q value(FDR adjusted)* |
| --- | --- | --- | --- | --- | --- | --- | --- | --- | --- | --- | --- | --- |
|  | Mid | P25 | P75 |  | Mid | P25 | P75 |  |
| anfG |  | 0 | 0 | 0 |  | 0 | 0 | 0 |  | / | / | / |
| narY |  | 0.000285253 | 0 | 0.000990803 |  | 0 | 0.000116757 | 0.00036772 |  | -1.45 | 0.15 | 0.35 |
| nirS |  | 0.001914841 | 0.000576363 | 0.003010239 |  | 0.000784506 | 0.002102468 | 0.005023459 |  | -1.16 | 0.25 | 0.46 |
| narZ |  | 0.001733832 | 0.000363133 | 0.004979955 |  | 0.000327506 | 0.000785391 | 0.002414653 |  | -1.38 | 0.17 | 0.36 |
| amoB_B |  | 0 | 0 | 0 |  | 0 | 0 | 0 |  | / | / | / |
| narW |  | 0.000219785 | 0 | 0.001109244 |  | 0 | 8.90576E-05 | 0.000344044 |  | -1.14 | 0.25 | 0.46 |
| narJ |  | 0.004619944 | 0.00251754 | 0.007927834 |  | 0.002522295 | 0.004113011 | 0.00749475 |  | -0.35 | 0.73 | 0.84 |
| napC |  | 0.00173862 | 0.001013889 | 0.003588076 |  | 0.00063056 | 0.001550505 | 0.003353033 |  | -1.01 | 0.31 | 0.54 |
| pmoB |  | 0 | 0 | 0 |  | 0 | 0 | 0 |  | / | / | / |
| glsA |  | 0.063754065 | 0.054184897 | 0.06991626 |  | 0.055309885 | 0.062676234 | 0.071590451 |  | -0.04 | 0.97 | 0.97 |
| norC |  | 0 | 0 | 0 |  | 0 | 0 | 0 |  | / | / | / |
| nirD |  | 0.001439204 | 0.000833773 | 0.00363325 |  | 0.001038568 | 0.001870254 | 0.004516344 |  | -0.84 | 0.40 | 0.62 |
| nirA |  | 0.008722164 | 0.004544664 | 0.014089475 |  | 0.005334081 | 0.009026502 | 0.013315245 |  | -0.04 | 0.97 | 0.97 |
| narH |  | 0.001075768 | 0.000419867 | 0.002029708 |  | 0.000446208 | 0.000761863 | 0.001859217 |  | -0.70 | 0.49 | 0.71 |
| napA |  | 0.005112492 | 0.002994281 | 0.00869009 |  | 0.003339738 | 0.004903929 | 0.008512051 |  | -0.07 | 0.94 | 0.97 |
| nirB |  | 0.014377754 | 0.009841075 | 0.019894221 |  | 0.00711372 | 0.011683731 | 0.016843263 |  | -1.40 | 0.16 | 0.35 |
| hzsB |  | 0 | 0 | 0 |  | 0 | 0 | 0 |  | -0.36 | 0.72 | 0.84 |
| narG |  | 0.001763648 | 0.001122274 | 0.003634491 |  | 0.000794968 | 0.00148743 | 0.002632935 |  | -0.88 | 0.38 | 0.61 |
| amoA_B |  | 0 | 0 | 0 |  | 0 | 0 | 0 |  | / | / | / |
| narV |  | 0 | 0 | 0 |  | 0 | 0 | 0 |  | / | / | / |
| hzsA |  | 0.000219497 | 0.00010581 | 0.000798477 |  | 7.47649E-05 | 0.000257585 | 0.000537385 |  | -0.36 | 0.72 | 0.84 |
| narC |  | 6.15828E-05 | 0 | 0.000343822 |  | 0 | 9.7347E-05 | 0.000356452 |  | -0.46 | 0.64 | 0.84 |
| narB |  | 0.002498204 | 0.000975149 | 0.004764138 |  | 0.00117968 | 0.002076321 | 0.003784381 |  | -0.70 | 0.49 | 0.71 |
| hcp |  | 0.033697768 | 0.027312859 | 0.037722824 |  | 0.026369632 | 0.033659842 | 0.037763261 |  | -0.09 | 0.93 | 0.97 |
| hao |  | 0 | 0 | 0 |  | 0 | 0 | 0 |  | / | / | / |
| gdh_K00261 |  | 0.040725564 | 0.037374014 | 0.043751314 |  | 0.038277155 | 0.040595406 | 0.044295945 |  | -0.20 | 0.84 | 0.90 |
| glnA |  | 0.094122436 | 0.086576697 | 0.105196029 |  | 0.087114118 | 0.096031809 | 0.107643084 |  | -0.89 | 0.37 | 0.61 |
| nrfB |  | 0.000648299 | 6.44933E-05 | 0.001797777 |  | 4.47804E-05 | 0.000207973 | 0.000664408 |  | -1.56 | 0.12 | 0.32 |
| nrfC |  | 0.010866309 | 0.008327722 | 0.021436417 |  | 0.006908624 | 0.010161804 | 0.018640474 |  | -0.64 | 0.52 | 0.73 |
| nrfA |  | 0.005252991 | 0.002286806 | 0.007629164 |  | 0.001938849 | 0.003491165 | 0.006218091 |  | -1.42 | 0.15 | 0.35 |
| gs_K00284 |  | 0.012430068 | 0.008115046 | 0.022118531 |  | 0.009512637 | 0.015135568 | 0.020606715 |  | -0.59 | 0.55 | 0.74 |
| nirK |  | 0.0006855 | 0.000113852 | 0.002846658 |  | 0.000167086 | 0.001104163 | 0.004745864 |  | -1.06 | 0.29 | 0.52 |
| NR |  | 0.012250035 | 0.006884986 | 0.022509315 |  | 0.005267886 | 0.009722181 | 0.016079646 |  | -1.25 | 0.21 | 0.41 |
| amoC_B |  | 0 | 0 | 0 |  | 0 | 0 | 0 |  | / | / | / |
| gs_K00265 |  | 0.023708426 | 0.014800212 | 0.031478452 |  | 0.013736811 | 0.018308564 | 0.024781379 |  | -1.66 | 0.10 | 0.31 |
| gs_K00264 |  | 0.000402113 | 0.000126172 | 0.001461313 |  | 0.000143705 | 0.000636128 | 0.00202666 |  | -0.72 | 0.47 | 0.71 |
| gs_K00266 |  | 0.169324968 | 0.154573339 | 0.194492911 |  | 0.165853066 | 0.180677703 | 0.19782535 |  | -1.33 | 0.18 | 0.37 |
| ureC |  | 0.006244098 | 0.003269046 | 0.01092484 |  | 0.006325859 | 0.008844927 | 0.012245246 |  | -2.28 | 0.02 | 0.08 |
| nao |  | 0 | 0 | 0 |  | 0 | 0 | 0 |  | / | / | / |
| nosZ |  | 0.020065397 | 0.013997628 | 0.029118261 |  | 0.011890683 | 0.016170731 | 0.019934069 |  | -2.24 | **0.03** | 0.11 |
| nasB |  | 0.000457029 | 4.77724E-05 | 0.001013777 |  | 0.000179479 | 0.000661521 | 0.001229111 |  | -1.47 | 0.14 | 0.35 |
| nasA |  | 0.028830166 | 0.023597805 | 0.033696577 |  | 0.02059285 | 0.023733078 | 0.031564051 |  | -1.83 | 0.07 | 0.23 |
| nmo |  | 0.163720773 | 0.149066338 | 0.178844479 |  | 0.152341153 | 0.166157052 | 0.184873689 |  | -0.90 | 0.37 | 0.61 |
| asnB |  | 0.056928591 | 0.050161283 | 0.06723993 |  | 0.047717022 | 0.056180713 | 0.067910757 |  | -0.27 | 0.79 | 0.90 |
| gdh_K00260 |  | 0.000151815 | 0 | 0.00052848 |  | 0 | 0.000143758 | 0.0003704 |  | -0.23 | 0.82 | 0.90 |
| gdh_K00262* |  | 0.056072265 | 0.045126235 | 0.063243673 |  | 0.053444228 | 0.06343383 | 0.071480967 |  | -2.79 | 0.01 | 0.05 |
| ureB |  | 0.001222025 | 0.0006354 | 0.002621064 |  | 0.001192859 | 0.001794444 | 0.002837824 |  | -1.83 | 0.07 | 0.23 |
| nifH |  | 0.011072033 | 0.006444691 | 0.015935905 |  | 0.006127734 | 0.010489024 | 0.014667983 |  | -0.44 | 0.66 | 0.84 |
| nifK |  | 0.000601205 | 0.000211228 | 0.001623154 |  | 0.000266481 | 0.000562395 | 0.001157127 |  | -0.35 | 0.73 | 0.84 |
| ureA |  | 0.001135432 | 0.000574462 | 0.001886943 |  | 0.001117463 | 0.001544634 | 0.002722023 |  | -2.23 | **0.03** | 0.11 |
| norB |  | 8.6611E-05 | 0 | 0.000365173 |  | 0 | 0.000117893 | 0.000306643 |  | -0.21 | 0.83 | 0.90 |
| nxrB |  | 0 | 0 | 0 |  | 0 | 0 | 0 |  | / | / | / |
| nifD |  | 0.005108775 | 0.003242996 | 0.007261131 |  | 0.003150432 | 0.005495092 | 0.008743451 |  | -0.34 | 0.73 | 0.84 |
| gdh_K15371 |  | 0.041489088 | 0.033457694 | 0.046454465 |  | 0.032490506 | 0.03659253 | 0.041148721 |  | -2.30 | 0.02 | 0.08 |
| narI |  | 0.001191232 | 0.000481682 | 0.003163699 |  | 0.000206191 | 0.000655619 | 0.001675554 |  | -1.55 | 0.12 | 0.32 |
| ansB |  | 0.039818826 | 0.036093723 | 0.045488678 |  | 0.03208648 | 0.037359584 | 0.043633022 |  | -1.59 | 0.11 | 0.32 |
| nrfD |  | 0.002976843 | 0.000928042 | 0.004951902 |  | 0.000550028 | 0.001547876 | 0.003561279 |  | -1.41 | 0.16 | 0.35 |
| nifW |  | 0 | 0 | 0 |  | 0 | 0 | 0 |  | / | / | / |
| napB |  | 0.001215535 | 0.000672592 | 0.001744474 |  | 0.000372014 | 0.000871046 | 0.002491528 |  | -0.62 | 0.53 | 0.73 |

Abbreviation: SJL, social jetlag; Mid, Median; P25, 25th percentile; P75, 75th percentile; N, number of participants; FDR, fase discovery rate.
